# Supplementary material for: Association of the Implementation of Child Tax Credit Advance Payments With Food Insufficiency in US Households
Source: PubMed Central journal article supplement (PMC8759005; doi:10.1001/jamanetworkopen.2021.43296), 2022-01-13
Supplement: jamanetwopen-e2143296-s001.pdf [file jamanetwopen-e2143296-s001.pdf]

## Supplementary Online Content

Shafer PR, Gutiérrez KM, Ettinger de Cuba S, Bovell-Ammon A, Raifman J. Association of the implementation of Child Tax Credit advance payments with food insufficiency in US households. *JAMA Netw Open*. 2022;5(1):e2143296. doi:10.1001/jamanetworkopen.2021.43296

**eFigure 1.** Assessment of Outcome Pre-trends for Difference-in-Differences

**eTable 1.** Household Food Insufficiency by Race and Ethnicity and Presence of Children in the Household, Census Bureau Household Pulse Survey, January to August 2021

**eFigure 2.** Percentage Point Change in Prevalence of Household Food Insufficiency Following Introduction of Child Tax Credit Advance Payments, by State

**eFigure 3.** Prevalence of Household Food Insufficiency After the Introduction of Child Tax Credit Advance Payments, by State

**eTable 2.** Difference-in-Differences Estimates of Introduction of Child Tax Credit Advance Payments on Household Food Insufficiency

**eTable 3.** Modified Poisson Regression Estimates of Introduction of Child Tax Credit Advance Payments on Household Food Insufficiency

This supplementary material has been provided by the authors to give readers additional information about their work.

**eFigure 1.** Assessment of Outcome Pre-trends for Difference-in-Differences

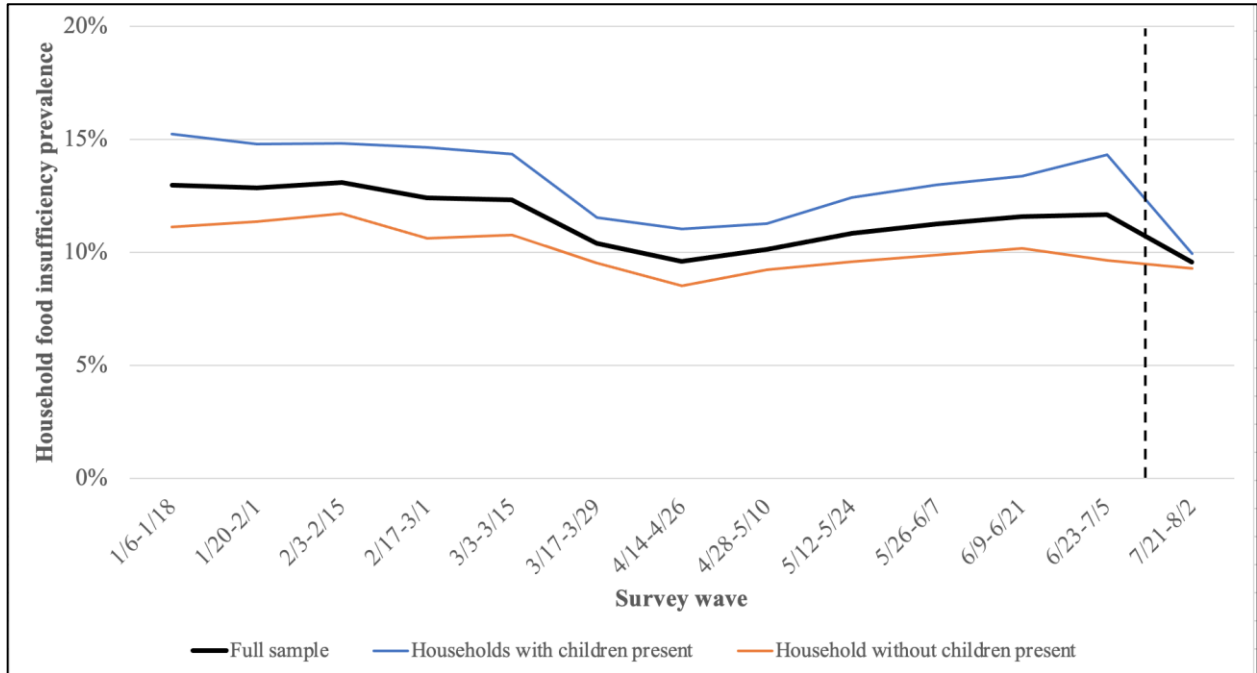

Weighted using household survey weights divided by number of waves.

Source: Authors' analysis of Household Pulse Survey data from the Census Bureau, July to August 2021 (final wave of Phase 3.2).

**eTable 1.** Household Food Insecurity by Race and Ethnicity and Presence of Children in the Household, Census Bureau Household Pulse Survey, January to August 2021

| Sample, %<br>(95% confidence interval) | Survey wave           |                       |                       |                       |                       |                       |                       |                       |                       |                       |                       |                       |                       |
|----------------------------------------|-----------------------|-----------------------|-----------------------|-----------------------|-----------------------|-----------------------|-----------------------|-----------------------|-----------------------|-----------------------|-----------------------|-----------------------|-----------------------|
|                                        | 1/6-1/18              | 1/20-2/1              | 2/3-2/15              | 2/17-3/1              | 3/3-3/15              | 3/17-3/29             | 4/14-4/26             | 4/28-5/10             | 5/12-5/24             | 5/26-6/7              | 6/9-6/21              | 6/23-7/5              | 7/21-8/2              |
| Full sample                            | 13.0%<br>(12.3, 13.6) | 12.9%<br>(12.2, 13.5) | 13.1%<br>(12.4, 13.8) | 12.4%<br>(11.7, 13.1) | 12.3%<br>(11.7, 13.0) | 10.4%<br>(9.8, 11.1)  | 9.6%<br>(8.9, 10.2)   | 10.1%<br>(9.5, 10.7)  | 10.8%<br>(10.1, 11.5) | 11.2%<br>(10.6, 11.9) | 11.6%<br>(10.9, 12.3) | 11.7%<br>(11.0, 12.3) | 9.6%<br>(9.0, 10.2)   |
| Non-Hispanic white                     | 9.4%<br>(8.8, 10.0)   | 9.0%<br>(8.4, 9.6)    | 10.0%<br>(9.3, 10.7)  | 9.0%<br>(8.3, 9.7)    | 8.6%<br>(7.9, 9.3)    | 7.6%<br>(6.9, 8.2)    | 6.7%<br>(6.1, 7.2)    | 7.1%<br>(6.5, 7.6)    | 7.9%<br>(7.3, 8.5)    | 8.4%<br>(7.7, 9.1)    | 8.2%<br>(7.6, 8.9)    | 8.4%<br>(7.7, 9.0)    | 7.1%<br>(6.5, 7.7)    |
| Hispanic                               | 20.3%<br>(18.1, 22.5) | 20.2%<br>(18.0, 22.4) | 18.6%<br>(16.5, 20.7) | 18.2%<br>(16.2, 20.3) | 19.9%<br>(17.5, 22.3) | 16.4%<br>(14.2, 18.5) | 16.5%<br>(14.3, 18.8) | 16.2%<br>(14.1, 18.3) | 17.3%<br>(14.5, 20.1) | 17.3%<br>(15.1, 19.5) | 17.0%<br>(14.6, 19.3) | 18.4%<br>(16.2, 20.7) | 12.0%<br>(10.2, 13.9) |

|                          |                       |                       |                       |                       |                       |                       |                       |                       |                       |                       |                       |                       |                       |
|--------------------------|-----------------------|-----------------------|-----------------------|-----------------------|-----------------------|-----------------------|-----------------------|-----------------------|-----------------------|-----------------------|-----------------------|-----------------------|-----------------------|
| Non-Hispanic Black       | 23.0%<br>(20.5, 25.6) | 22.1%<br>(19.7, 24.6) | 22.9%<br>(20.2, 25.7) | 23.1%<br>(20.6, 25.7) | 22.2%<br>(19.8, 24.7) | 18.4%<br>(15.9, 20.9) | 16.2%<br>(13.7, 18.6) | 19.3%<br>(16.8, 21.8) | 18.4%<br>(16.0, 20.8) | 17.1%<br>(14.7, 19.5) | 21.0%<br>(18.4, 23.7) | 20.1%<br>(17.8, 22.4) | 19.1%<br>(16.4, 21.8) |
| Non-Hispanic Asian       | 5.7%<br>(4.1, 7.3)    | 8.0%<br>(6.1, 9.9)    | 6.2%<br>(4.4, 8.0)    | 6.2%<br>(4.4, 7.9)    | 6.3%<br>(4.1, 8.5)    | 5.0%<br>(3.4, 6.7)    | 4.6%<br>(2.8, 6.5)    | 5.0%<br>(3.4, 6.6)    | 6.4%<br>(3.7, 9.2)    | 6.4%<br>(4.7, 8.2)    | 5.3%<br>(3.7, 7.0)    | 4.8%<br>(3.4, 6.3)    | 4.9%<br>(2.7, 7.0)    |
| All others               | 18.6%<br>(15.1, 22.1) | 19.4%<br>(16.1, 22.7) | 16.6%<br>(13.5, 19.7) | 19.1%<br>(16.0, 22.3) | 17.6%<br>(14.4, 20.8) | 15.0%<br>(11.9, 18.0) | 15.2%<br>(12.2, 18.2) | 13.6%<br>(11.0, 16.2) | 13.2%<br>(10.5, 15.9) | 18.8%<br>(15.5, 22.0) | 19.4%<br>(16.1, 22.7) | 19.0%<br>(15.7, 22.4) | 15.1%<br>(11.9, 18.3) |
| Households with children | 15.2%<br>(14.2, 16.3) | 14.8%<br>(13.8, 15.8) | 14.8%<br>(13.7, 15.9) | 14.6%<br>(13.6, 15.7) | 14.3%<br>(13.3, 15.4) | 11.5%<br>(10.5, 12.6) | 11.0%<br>(10.0, 12.1) | 11.3%<br>(10.3, 12.2) | 12.4%<br>(11.2, 13.6) | 13.0%<br>(11.9, 14.1) | 13.4%<br>(12.3, 14.5) | 14.3%<br>(13.2, 15.4) | 9.9%<br>(9.0, 10.9)   |
| Non-Hispanic white       | 10.4%<br>(9.4, 11.3)  | 8.9%<br>(8.0, 9.9)    | 10.4%<br>(9.2, 11.6)  | 9.0%<br>(7.9, 10.0)   | 9.3%<br>(8.2, 10.4)   | 7.2%<br>(6.3, 8.2)    | 6.9%<br>(5.9, 8.0)    | 7.0%<br>(6.1, 7.9)    | 7.9%<br>(6.9, 8.8)    | 8.7%<br>(7.6, 9.8)    | 9.0%<br>(8.0, 10.1)   | 10.0%<br>(8.7, 11.2)  | 6.5%<br>(5.7, 7.4)    |

|                                   |                          |                          |                          |                          |                          |                          |                          |                          |                          |                          |                          |                          |                          |
|-----------------------------------|--------------------------|--------------------------|--------------------------|--------------------------|--------------------------|--------------------------|--------------------------|--------------------------|--------------------------|--------------------------|--------------------------|--------------------------|--------------------------|
| Hispanic                          | 22.4%<br>(19.3,<br>25.6) | 24.0%<br>(20.8,<br>27.2) | 21.0%<br>(17.9,<br>24.1) | 22.5%<br>(19.3,<br>25.6) | 21.5%<br>(18.5,<br>24.5) | 18.9%<br>(15.5,<br>22.2) | 18.9%<br>(15.5,<br>22.3) | 16.9%<br>(14.0,<br>19.7) | 19.3%<br>(15.1,<br>23.5) | 18.7%<br>(15.6,<br>21.8) | 20.3%<br>(16.8,<br>23.8) | 22.3%<br>(18.9,<br>25.8) | 12.3%<br>(9.6,<br>15.0)  |
| Non-<br>Hispanic<br>Black         | 26.0%<br>(22.3,<br>29.7) | 25.8%<br>(22.2,<br>29.3) | 25.9%<br>(22.2,<br>29.5) | 28.2%<br>(24.4,<br>32.0) | 27.0%<br>(23.4,<br>30.6) | 20.2%<br>(16.8,<br>23.6) | 18.1%<br>(14.8,<br>21.4) | 22.0%<br>(18.3,<br>25.6) | 24.3%<br>(20.6,<br>28.0) | 21.4%<br>(17.9,<br>24.9) | 21.2%<br>(17.9,<br>24.5) | 22.3%<br>(19.0,<br>25.6) | 21.1%<br>(17.2,<br>25.0) |
| Non-<br>Hispanic<br>Asian         | 7.5%<br>(4.5,<br>10.4)   | 8.0%<br>(5.3,<br>10.6)   | 6.0%<br>(3.5,<br>8.5)    | 5.8%<br>(3.6,<br>8.1)    | 4.9%<br>(2.5,<br>7.2)    | 6.1%<br>(3.2,<br>8.9)    | 4.9%<br>(2.2,<br>7.7)    | 5.7%<br>(2.9,<br>8.5)    | 5.2%<br>(2.6,<br>7.7)    | 5.9%<br>(3.7,<br>8.2)    | 5.7%<br>(3.0,<br>8.3)    | 6.0%<br>(3.6,<br>8.4)    | 3.5%<br>(1.9,<br>5.0)    |
| All others                        | 20.3%<br>(14.8,<br>25.8) | 20.7%<br>(15.6,<br>25.7) | 18.3%<br>(13.5,<br>23.2) | 21.1%<br>(16.7,<br>25.5) | 15.8%<br>(11.6,<br>20.0) | 16.6%<br>(11.1,<br>22.1) | 16.0%<br>(11.4,<br>20.6) | 14.8%<br>(10.9,<br>18.7) | 12.1%<br>(8.1,<br>16.1)  | 21.3%<br>(16.0,<br>26.5) | 22.3%<br>(16.8,<br>27.7) | 20.5%<br>(15.6,<br>25.4) | 16.6%<br>(11.3,<br>21.9) |
| Households<br>without<br>children | 11.1%<br>(10.3,<br>11.9) | 11.3%<br>(10.5,<br>12.2) | 11.7%<br>(10.8,<br>12.6) | 10.6%<br>(9.8,<br>11.4)  | 10.8%<br>(9.9,<br>11.6)  | 9.5%<br>(8.7,<br>10.3)   | 8.5%<br>(7.8,<br>9.3)    | 9.2%<br>(8.5,<br>10.0)   | 9.6%<br>(8.8,<br>10.4)   | 9.9%<br>(9.1,<br>10.7)   | 10.2%<br>(9.3,<br>11.0)  | 9.6%<br>(8.9,<br>10.4)   | 9.3%<br>(8.5,<br>10.1)   |

|                    |                       |                       |                       |                       |                       |                       |                       |                       |                       |                       |                       |                       |                       |
|--------------------|-----------------------|-----------------------|-----------------------|-----------------------|-----------------------|-----------------------|-----------------------|-----------------------|-----------------------|-----------------------|-----------------------|-----------------------|-----------------------|
| Non-Hispanic white | 8.8%<br>(8.0, 9.6)    | 9.0%<br>(8.2, 9.9)    | 9.8%<br>(8.8, 10.7)   | 9.1%<br>(8.1, 10.0)   | 8.1%<br>(7.3, 8.9)    | 7.8%<br>(6.9, 8.7)    | 6.5%<br>(5.8, 7.2)    | 7.1%<br>(6.4, 7.8)    | 8.0%<br>(7.2, 8.8)    | 8.2%<br>(7.3, 9.0)    | 7.7%<br>(7.0, 8.5)    | 7.3%<br>(6.6, 8.0)    | 7.4%<br>(6.6, 8.2)    |
| Hispanic           | 17.5%<br>(14.7, 20.4) | 15.9%<br>(13.0, 18.7) | 15.8%<br>(13.1, 18.5) | 13.2%<br>(10.7, 15.6) | 17.9%<br>(14.0, 21.7) | 13.7%<br>(11.0, 16.3) | 13.7%<br>(10.9, 16.5) | 15.4%<br>(12.4, 18.5) | 14.9%<br>(11.5, 18.3) | 15.6%<br>(12.4, 18.8) | 12.9%<br>(10.0, 15.8) | 14.5%<br>(11.8, 17.2) | 11.8%<br>(9.4, 14.2)  |
| Non-Hispanic Black | 19.9%<br>(16.2, 23.6) | 18.6%<br>(15.3, 21.9) | 20.0%<br>(15.9, 24.1) | 17.5%<br>(14.2, 20.9) | 17.6%<br>(14.2, 20.9) | 16.5%<br>(12.9, 20.1) | 14.4%<br>(10.7, 18.1) | 16.5%<br>(13.0, 20.0) | 12.6%<br>(9.8, 15.4)  | 12.9%<br>(9.7, 16.1)  | 20.8%<br>(16.7, 24.9) | 17.8%<br>(14.6, 20.9) | 17.3%<br>(13.6, 21.0) |
| Non-Hispanic Asian | 4.3%<br>(2.8, 5.7)    | 8.1%<br>(5.5, 10.7)   | 6.3%<br>(3.7, 8.8)    | 6.5%<br>(3.8, 9.1)    | 7.8%<br>(4.1, 11.4)   | 4.1%<br>(2.3, 5.8)    | 4.4%<br>(1.9, 6.8)    | 4.3%<br>(2.6, 5.9)    | 7.5%<br>(3.0, 12.0)   | 6.8%<br>(4.3, 9.3)    | 5.0%<br>(3.0, 7.0)    | 3.8%<br>(2.2, 5.4)    | 6.0%<br>(2.3, 9.8)    |
| All others         | 17.1%<br>(12.8, 21.5) | 18.3%<br>(13.9, 22.6) | 15.2%<br>(11.3, 19.1) | 17.3%<br>(12.8, 21.7) | 19.1%<br>(14.4, 23.7) | 13.7%<br>(10.3, 17.0) | 14.5%<br>(10.5, 18.5) | 12.5%<br>(9.0, 16.0)  | 14.2%<br>(10.5, 17.8) | 16.3%<br>(12.4, 20.2) | 17.4%<br>(13.4, 21.5) | 17.7%<br>(13.1, 22.2) | 14.0%<br>(10.0, 18.0) |

Weighted using household survey weights divided by number of waves.

Source: Authors' analysis of Household Pulse Survey data from the Census Bureau, January to August 2021.

**eFigure 2.** Percentage Point Change in Prevalence of Household Food Insufficiency Following Introduction of Child Tax Credit Advance Payments, by State

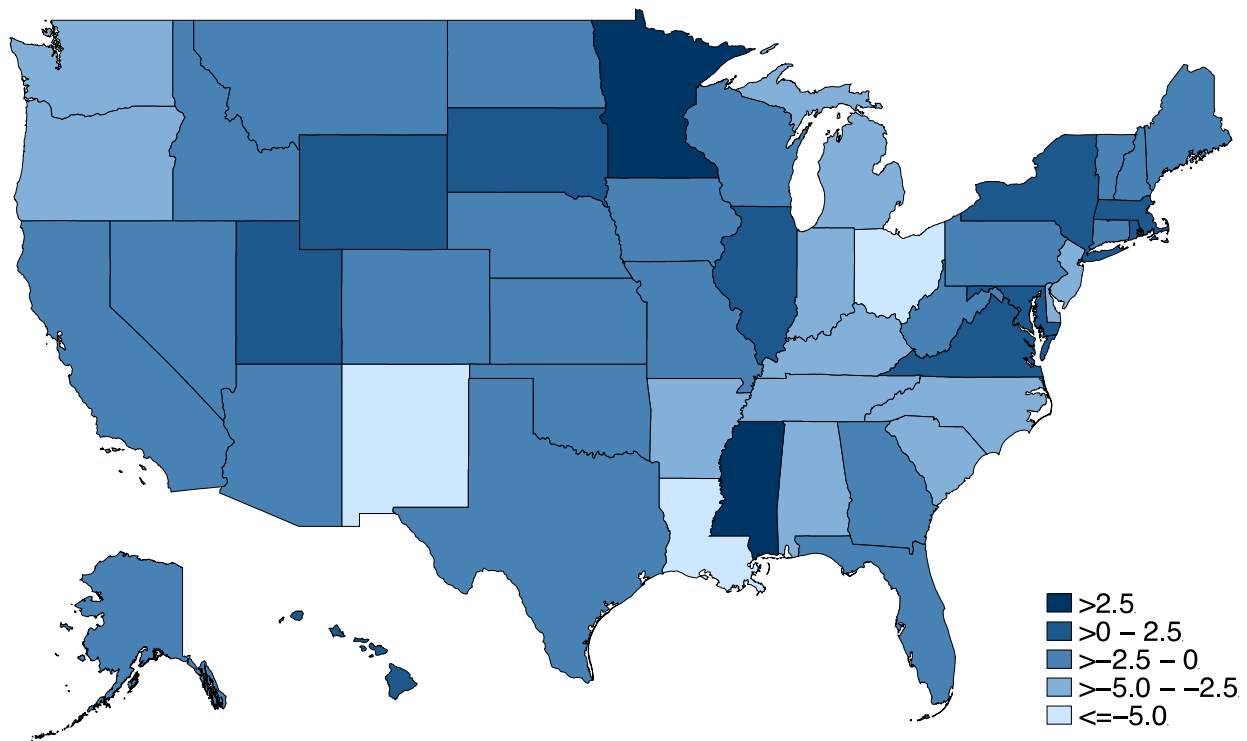

Weighted using household survey weights divided by number of waves. This captures the change in prevalence of household food insufficiency by state from the survey wave after the first advanced payment of the Child Tax Credit (July 21 to August 2, 2021) from the one right before (June 23 to July 5, 2021) [negative implies a reduction in household food insufficiency].

Source: Authors' analysis of Household Pulse Survey data from the Census Bureau, June to August 2021 (final wave of Phase 3.1 to first wave of Phase 3.2).

**eFigure 3.** Prevalence of Household Food Insecurity After the Introduction of Child Tax Credit Advance Payments, by State

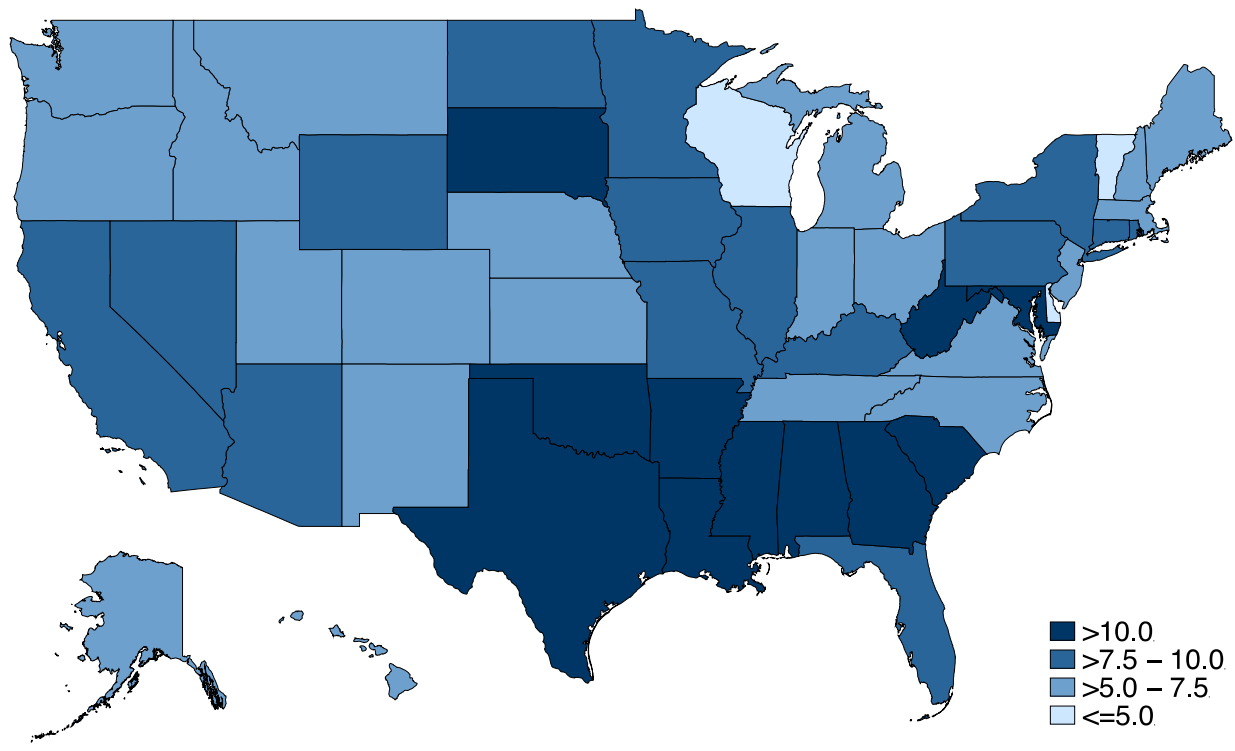

Weighted using household survey weights divided by number of waves.

Source: Authors' analysis of Household Pulse Survey data from the Census Bureau, July to August 2021 (final wave of Phase 3.2).



**eTable 2.** Difference-in-Differences Estimates of Introduction of Child Tax Credit Advance Payments on Household Food Insufficiency

| Characteristic                                                       | Household food insufficiency (n=585,170) |         |
|----------------------------------------------------------------------|------------------------------------------|---------|
|                                                                      | Coefficient<br>(95% confidence interval) | P-value |
| Post-period indicator                                                | -0.025<br>(-0.034, -0.015)               | <.001   |
| Presence of children<br>in household<br>indicator                    | 0.031<br>(0.023, 0.039)                  | <.001   |
| Post-period x<br>presence of children<br>in household<br>interaction | -0.022<br>(-0.035, -0.010)               | .001    |
| Sex at birth (%)                                                     |                                          |         |
| Female                                                               | -0.006<br>(-0.009, -0.003)               | .001    |
| Male                                                                 | –                                        | –       |
| Age group (%)                                                        |                                          |         |
| 18-24                                                                | –                                        | –       |
| 25-44                                                                | 0.051<br>(0.042, 0.059)                  | <.001   |

|                               |                            |       |
|-------------------------------|----------------------------|-------|
| 45-64                         | 0.027<br>(0.017, 0.037)    | <.001 |
| Race/ethnicity                |                            |       |
| Non-Hispanic white            | –                          | –     |
| Hispanic                      | 0.024<br>(0.013, 0.035)    | <.001 |
| Non-Hispanic Black            | 0.053<br>(0.046, 0.060)    | <.001 |
| Non-Hispanic Asian            | -0.009<br>(-0.014, -0.005) | <.001 |
| All others                    | 0.046<br>(0.036, 0.056)    | <.001 |
| Education                     |                            |       |
| Less than high school         | –                          | –     |
| High school or equivalent     | -0.073<br>(-0.088, -0.058) | <.001 |
| Some college or 2-year degree | -0.098<br>(-0.113, -0.083) | <.001 |
| 4-year degree or more         | -0.135<br>(-0.149, -0.121) | <.001 |
| Household income              |                            |       |
| <\$25,000                     | –                          | –     |

|                               |                            |       |
|-------------------------------|----------------------------|-------|
| \$25,000-34,999               | -0.053<br>(-0.062, -0.043) | <.001 |
| \$35,000-49,999               | -0.090<br>(-0.101, -0.079) | <.001 |
| \$50,000-74,999               | -0.128<br>(-0.139, -0.118) | <.001 |
| \$75,000-149,999              | -0.150<br>(-0.161, -0.139) | <.001 |
| ≥\$150,000                    | -0.147<br>(-0.157, -0.137) | <.001 |
| Missing                       | -0.129<br>(-0.139, -0.119) | <.001 |
| Marital status                |                            |       |
| Married                       | -0.025<br>(-0.029, -0.020) | <.001 |
| Not married                   | –                          | –     |
| Number of adults in household |                            |       |
| 1                             | –                          | –     |
| 2                             | -0.015<br>(-0.020, -0.009) | <.001 |
| 3 or more                     | -0.005<br>(-0.014, 0.004)  | .252  |

|                                                                                                  |                            |       |
|--------------------------------------------------------------------------------------------------|----------------------------|-------|
| Number of children in household                                                                  |                            |       |
| 0                                                                                                | –                          | –     |
| 1                                                                                                | -0.014<br>(-0.024, -0.005) | .004  |
| 2                                                                                                | -0.015<br>(-0.025, -0.006) | .002  |
| 3 or more                                                                                        | –                          | –     |
| Employment for respondent in the last 7 days                                                     | -0.055<br>(-0.060, -0.050) | <.001 |
| Receipt of unemployment insurance benefits by respondent in the last 7 days                      | .002<br>(-0.013, 0.018)    | .773  |
| Current receipt of Supplemental Nutrition Assistance Program benefits by anyone in the household | 0.022<br>(0.009, 0.035)    | .001  |

|                                                                                  |                            |       |
|----------------------------------------------------------------------------------|----------------------------|-------|
| Receipt of food aid in the last 7 days by anyone in the household                | 0.079<br>(0.071, 0.087)    | <.001 |
| Receipt of Economic Impact Payment in the last 7 days by anyone in the household | 0.004<br>(-0.003, 0.011)   | .241  |
| Health insurance coverage                                                        |                            |       |
| Uninsured                                                                        | –                          | –     |
| Public                                                                           | -0.032<br>(-0.040, -0.023) | <.001 |
| Private                                                                          | -0.056<br>(-0.064, -0.049) | <.001 |

Model also includes state and survey wave fixed effects and a constant term, weighted using household survey weights divided by number of waves with standard errors clustered at the state level.

Source: Authors' analysis of Household Pulse Survey data from the Census Bureau, January to August 2021.

**eTable 3.** Modified Poisson Regression Estimates of Introduction of Child Tax Credit Advance Payments on Household Food Insufficiency

| Characteristic                               | Household food insufficiency (n=585,170)               |         |
|----------------------------------------------|--------------------------------------------------------|---------|
|                                              | Adjusted prevalence ratio<br>(95% confidence interval) | P-value |
| Receipt of Child Tax Credit advanced payment | 0.792<br>(0.670, 0.936)                                | .007    |
| Sex at birth (%)                             |                                                        |         |
| Female                                       | 0.944<br>(0.916, 0.973)                                | <.001   |
| Male                                         | –                                                      | –       |
| Age group (%)                                |                                                        |         |
| 18-24                                        | –                                                      | –       |
| 25-44                                        | 1.364<br>(1.277, 1.457)                                | <.001   |
| 45-64                                        | 1.123<br>(1.033, 1.221)                                | .007    |
| Race/ethnicity                               |                                                        |         |
| Non-Hispanic white                           | –                                                      | –       |
| Hispanic                                     | 1.210<br>(1.126, 1.230)                                | <.001   |

|                               |                         |       |
|-------------------------------|-------------------------|-------|
| Non-Hispanic Black            | 1.404<br>(1.334, 1.477) | <.001 |
| Non-Hispanic Asian            | 0.853<br>(0.793, 0.918) | <.001 |
| All others                    | 1.443<br>(1.350, 1.542) | <.001 |
| Education                     |                         |       |
| Less than high school         | –                       | –     |
| High school or equivalent     | 0.787<br>(0.743, 0.833) | <.001 |
| Some college or 2-year degree | 0.680<br>(0.643, 0.719) | <.001 |
| 4-year degree or more         | 0.335<br>(0.317, 0.354) | <.001 |
| Household income              |                         |       |
| <\$25,000                     | –                       | –     |
| \$25,000-34,999               | 0.885<br>(0.851, 0.920) | <.001 |
| \$35,000-49,999               | 0.747<br>(0.704, 0.792) | <.001 |
| \$50,000-74,999               | 0.519<br>(0.485, 0.556) | <.001 |

|                                 |                         |       |
|---------------------------------|-------------------------|-------|
| \$75,000-149,999                | 0.252<br>(0.226, 0.281) | <.001 |
| ≥\$150,000                      | 0.098<br>(0.083, 0.114) | <.001 |
| Missing                         | 0.559<br>(0.529, 0.591) | <.001 |
| Marital status                  |                         |       |
| Married                         | 0.792<br>(0.763, 0.823) | <.001 |
| Not married                     | –                       | –     |
| Number of adults in household   |                         |       |
| 1                               | –                       |       |
| 2                               | 0.889<br>(0.854, 0.926) | <.001 |
| 3 or more                       | 0.987<br>(0.934, 1.042) | .618  |
| Number of children in household |                         |       |
| 0                               | –                       | –     |
| 1                               | 1.119<br>(1.064, 1.178) | <.001 |



|                                                                                                  |                         |       |
|--------------------------------------------------------------------------------------------------|-------------------------|-------|
| 2                                                                                                | 1.109<br>(1.055, 1.166) | <.001 |
| 3 or more                                                                                        | 1.213<br>(1.143, 1.288) | <.001 |
| Employment for respondent in the last 7 days                                                     | 0.665<br>(0.645, 0.685) | <.001 |
| Receipt of unemployment insurance benefits by respondent in the last 7 days                      | 1.053<br>(0.973, 1.138) | .195  |
| Current receipt of Supplemental Nutrition Assistance Program benefits by anyone in the household | 1.025<br>(0.964, 1.091) | .420  |
| Receipt of food aid in the last 7 days by anyone in the household                                | 1.447<br>(1.394, 1.502) | <.001 |

|                                                                                  |                         |       |
|----------------------------------------------------------------------------------|-------------------------|-------|
| Receipt of Economic Impact Payment in the last 7 days by anyone in the household | 1.064<br>(1.001, 1.124) | .029  |
| Health insurance coverage                                                        |                         |       |
| Uninsured                                                                        | –                       | –     |
| Public                                                                           | 0.845<br>(0.806, 0.885) | <.001 |
| Private                                                                          | 0.696<br>(0.659, 0.734) | <.001 |

Model also includes state and survey wave fixed effects and a constant term, weighted using household survey weights divided by number of waves with standard errors clustered at the state level.

Source: Authors' analysis of Household Pulse Survey data from the Census Bureau, January to August 2021.
